## Water deprivation increases maternal corticosterone levels and enhances offspring growth in the snake *Vipera aspis*

Andréaz Dupoué<sup>1,2,\*</sup>, Frédéric Angelier<sup>1</sup>, François Brischoux<sup>1</sup>, Dale F. DeNardo<sup>3</sup>, Colette Trouvé<sup>1</sup>, Charline Parenteau<sup>1</sup>, Olivier Lourdaïs<sup>1,3</sup>

<sup>1</sup> Centre d'Etudes Biologiques de Chizé, UMR 7372 CNRS-ULR, 79360 Villiers en Bois, France

<sup>2</sup> Université de Poitiers, 40 avenue du recteur Pinaud 86022 Poitiers, France

<sup>3</sup> School of Life Sciences, Arizona State University, Tempe, AZ 85287-4501, USA

\* Correspondence:

Andréaz Dupoué, CEBC UMR 7372 CNRS-ULR

79360 Villiers en Bois, FRANCE

Phone: + 33 (0) 5 49 09 35 52

Fax: + 33 (0) 5 49 09 65 26

E-mail: [andreaz.dupoue@gmail.com](mailto:andreaz.dupoue@gmail.com)

For consideration in: *The Journal of Experimental Biology*

## Abstract

Circulating glucocorticoids (GCs) levels may increase as a result of reproductive effort or in response to unpredictable events. However, the GCs secretion can vary with the availability of vital trophic resources such as energy. While water represents another critical resource, the impact of water deprivation on GCs secretion during reproduction has not yet been thoroughly investigated. Here, we examined the effects of water deprivation on plasma corticosterone (CORT) concentrations of female aspik vipers (*Vipera aspis*), and we determined the impacts of water deprivation on offspring traits. We exposed both pregnant and non-reproductive females to a 20-day water deprivation and compared their pre- and post-deprivation CORT levels to those of control females. At the end of the treatment, only water-deprived pregnant females showed a significant increase in CORT levels. In pregnant females, changes in baseline CORT level were correlated to changes in female hydration state. Changes in baseline CORT levels were also negatively influenced by maternal reproductive effort in pregnant control females, while such relationship was not apparent in pregnant water-deprived females. Finally, we found that offspring from water-deprived females had higher growth rates than offspring from control females. Offspring growth was also positively correlated to changes in both maternal osmolality and baseline CORT levels. Together, our results suggest that dehydration increases maternal CORT levels which may subsequently influence offspring development. Further long-term field studies are therefore required to assess whether there is an adaptive significance of this response.

**Keywords.** Corticosterone; dehydration; maternal effects; offspring growth; reproductive effort; water-deprivation

## Introduction

Allostasis integrates an organism's functional responses to predictable and/or unpredictable environmental conditions (Angelier and Wingfield, 2013; Landys et al., 2006; McEwen and Wingfield, 2003; McEwen and Wingfield, 2010; Romero et al., 2009). In vertebrates, glucocorticoids (GCs) constitute the main mediators of allostasis because they are released in response to both natural physiological demands and unpredictable events (i.e., allostatic load or stress response) (McEwen and Wingfield, 2003; McEwen and Wingfield, 2010; Romero et al., 2009; Wingfield et al., 1998). GCs are essential for immediate survival, although, if over-secreted (i.e., allostatic overload or chronic stress), they impair other functions such as digestion, growth, immunity, or reproduction (Berger et al., 2005; Sapolsky et al., 2000; Wingfield et al., 1998). GCs secretion have thereby been viewed as a context-dependent adaptive response with positive, negative, or neutral impacts on physiological performance and fitness (Breuner et al., 2008).

Reproduction can be particularly challenging because it induces several constraints leading to a potential tradeoff with individual survival or lifetime reproductive success (i.e., the cost of reproduction) (Blount et al., in press; Bonnet et al., 1998; French et al., 2007; Magnhagen, 1991; Stier et al., 2012). For instance, investment in energy and time over reproduction (i.e., reproductive effort) is costly for individuals and can increase GCs levels (Bonier et al., 2009a; Bonier et al., 2009b; Bonier et al., 2011; Love et al., 2014). Concomitantly with predictable demands of reproductive effort, breeding individuals can also face unpredictable events that further amplify GCs secretion (e.g., density: (Dantzer et al., 2013), food shortage: (Kitaysky et al., 2010), heat stress: (Eriksen et al., 2007), predation: (Coslovsky and Richner, 2011; Saino et al., 2005), anthropogenic disturbances: (Ellenberg et al., 2007; Tartu et al., 2014)). Besides, several studies experimentally demonstrated that increase in maternal corticosterone levels (CORT, the main GC in birds, reptiles and rodents) significantly influenced offspring phenotypes (Belliere et al., 2004; Hayward and Wingfield, 2004; Meylan and Clobert, 2004; Meylan and Clobert, 2005; Meylan et al., 2002; Warner et al., 2009; Zagron and Weinstock, 2006). Such influence of maternal hormones on offspring traits, also known as maternal effects, are widespread in all taxa and may subsequently impact offspring fitness (Mousseau and Fox, 1998; Mousseau et al., 2009).

To the best of our knowledge, the effects of water deprivation on CORT secretion in breeding wild vertebrates and consequences on offspring have not yet been investigated in this

framework (but see Brischoux et al., 2015; Dupoué et al., 2014). CORT is presumed to be tightly linked to the water balance considering its role in allostasis and because CORT has been demonstrated to act as a mineralocorticoid that is involved in water balance and osmoregulation (Bentley, 2002; Dauphin-Villemant and Xavier, 1986; Duggan and Lofts, 1978; McCormick and Bradshaw, 2006). In that context, our study aims to better understand the functional link between water demand, maternal CORT levels, and offspring development in wild vertebrates.

To investigate the impacts of water availability on CORT secretion during pregnancy and then with offspring development, squamate reptiles (lizards and snakes) offer an excellent opportunity. Squamates display relatively limited dispersal capacities to evade environmental constraints and individuals are therefore directly exposed to local conditions (Aragón et al., 2010). Because pregnancy generally occurs during summer, reproductive females are particularly exposed to period of water shortage especially during associated drought periods. Moreover most viviparous species are lecithotrophic and embryonic energetic demands are supported by important yolk reserves. Thereby embryos mainly rely on the maternal water during their development (Stewart and Thompson, 2000). Embryonic water requirements may represent an important constraint since water demand increases exponentially with somatic growth during pregnancy (Dauphin-Villemant and Xavier, 1986; Lourdais et al., 2015). For instance, we recently documented an intergenerational trade-off for water (Dupoué et al., 2015a) in a viviparous snake, *Vipera aspis*. Suppressing access to water for 20 days, we found that pregnant females were twice as much dehydrated than non-reproductive ones. Water deprivation resulted in significant dehydration (i.e., increased mass loss and osmolality) that was amplified by fecundity. On the other hand, reproductive performances and offspring traits at birth were not affected (Dupoué et al., 2015a).

The present study provides complementary analysis of the data collected in our previous experiment on *V. aspis* (Dupoué et al., 2015a) but focusing on CORT levels. Our general hypothesis is that CORT levels are closely correlated to hydration state and should be affected by the interaction between water deprivation and reproductive status. Specifically we tested the following prediction:

- (i) Water privation should increase baseline CORT levels notably among reproductive females that are more prone to dehydration.

(ii) In response to a stress protocol, we expect a similar CORT stress-response between control and water-deprived snakes, but higher stress-induced CORT levels in water-deprived snakes compare to control ones due to higher baseline CORT levels (Dupoué et al., 2014).

(iii) CORT levels should be closely correlated to osmolality thereby supporting the linkage with hydration state.

Finally, we examined the influence of water deprivation and maternal CORT levels on offspring traits with a specific focus on early growth.

## Material & Methods

### *Animals*

The aspic viper (*Vipera aspis*), a medium-size viviparous snake that is abundant in Western Europe (Naulleau, 1981), is a typical capital breeder. Females mobilize their energy reserves for yolk production during vitellogenesis. Pregnancy begins in early June after ovulation (Naulleau, 1981), which is associated with a peri-ovulatory ecdysis (Lorioux et al., 2013a). Parturition occurs two to three months later from late August to early September (Lourdais et al., 2002b). Pregnant females often cease to feed (Bonnet et al., 1998; Lourdais et al., 2002a) mainly because of a behavioral shift that emphasizes thermoregulation over foraging (Lorioux et al., 2013b). During the entire study, we followed all laws and rules relating to the conservation and welfare of the animals (Permit # 792, Direction service vétérinaire des Deux-Sèvres).

This study was conducted simultaneously with a previously published study (see Dupoué et al., 2015a), and therefore animals and experimental design are as previously described.

Briefly, we caught 58 adult females (29 pregnant, 29 non-reproductive) in May and June 2012 from neighboring sites in western France (Vendée and Loire-Atlantique Districts).

Reproductive status was determined by palpation in the field and then pregnancy was confirmed with high resolution ultrasonography (SonoSite MicroMaxx, Bothell, WA, USA) when the animals were brought to the laboratory. All snakes were measured (snout-vent length, SVL  $\pm$  0.5 cm) and weighed (body mass, BM  $\pm$  1 g). Husbandry followed the protocol described in Lorioux et al. (2013b). Individuals were fasted two weeks prior to the start of the experiment and remained fasted throughout the experiment, thus preventing meal consumption from changing the snakes' water balance (Wright et al., 2013) and to avoid any influence of digestive activity on CORT levels.

### *Experimental design*

Individuals were randomly assigned to the control (pregnant:  $n = 15$ ; non-reproductive:  $n = 15$ ) or water-deprived (pregnant:  $n = 14$ ; non-reproductive:  $n = 14$ ) treatments (Dupoué et al., 2015a). Water-deprived and control females did not differ in BM or SVL (all  $p > 0.117$ ) (Dupoué et al., 2015a). During the experiment, housing conditions remained as described above, except that females in the water-deprived treatment had their water removed for 20 days during mid-gestation (Dupoué et al., 2015a). This duration represents that of a typical summer drought in western France (Dupoué et al., 2015a).

Of the 29 pregnant females, 26 (13 controls, 13 water-deprived) successfully completed pregnancy, producing 125 neonates (60 neonates born from control females, 65 neonates born from water-deprived females). Immediately after birth, each neonate was individually housed in a box (30 x 16 x 10 cm) with a thermal gradient (20 to 33 °C) 6 h per day (from 9:00 am to 3:00 pm) and water provided *ad libitum* in a bowl. Data from the female and her offspring were collected on the day of birth and again two weeks later (see below). Estimates of maternal reproductive effort were assessed by considering absolute measures of reproductive output that are routinely used (Bonnet et al., 2001; Dupoué and Lourdais, 2014; Lourdais et al., 2002a); that is, the total litter size or litter mass including viable neonates, stillborn individuals and undeveloped ova, and the ‘fit’ litter size or ‘fit’ litter mass, which include only viable neonates. While females likely invest similar amounts of yolk into each ovulated follicle, the water demands of each of these during pregnancy is likely highly dependent on whether the ovulated follicle becomes a live neonate or goes undeveloped. Because reproductive effort is largely driven by mother size (Bonnet et al., 2003), we also examined size-adjusted litter size (RLS), fit litter size (RFLS), litter mass (RLM), and fit litter mass (RLFM), which were derived from the residuals of the linear relationships between reproductive effort and maternal SVL (all  $p < 0.003$ ). Once all measurements were collected, females were each fed a mouse and then released with their litters at their original capture sites.

### *Blood sampling*

Blood samples were collected at the beginning and end of the water deprivation period (i.e., sampling session). Vipers were randomly bled in order to mix the hydric treatment and the reproductive status. Because of communal housing and the potential disturbance of cagemates

when taking an individual from its cage, we sampled only one female per cage in the morning or afternoon. All blood samples were collected via cardiocentesis, using a 1 ml heparinized syringe and a 27-gauge needle. Two blood samples were collected from each female during each sampling session. The first blood samples (i.e., baseline CORT level, 150  $\mu\text{L}$ ) were collected within 3 min (mean  $\pm$  SE:  $2.75 \pm 0.11$  min) of the snake being picked up from its cage. This duration is less than that required for measurable changes in CORT concentration in squamates (Romero and Wikelski, 2001). This blood sample was also used to determine plasma osmolality (see details in methods from Dupoué et al., 2015a). After blood sampling, the snake was placed in an empty transparent box (30 x 20 x 10 cm), which induces an increase in plasma CORT concentrations in snakes (Dupoué et al., 2013). After one hour, we collected a second blood sample (i.e., stress-induced CORT level, 100  $\mu\text{L}$ ). Collected blood was placed in a 0.675 ml microcentrifuge tube and centrifuged for 3 min at 2000 g. The plasma was separated and stored at  $-28^{\circ}\text{C}$ . Plasma CORT concentration ( $\text{ng}\cdot\text{ml}^{-1}$ ) was determined at the Centre d'Etudes Biologiques de Chizé (CEBC) following a well-established radioimmunoassay protocol (see Lormée et al., 2003 for details). We used a polyclonal Anti-CORT antibody produced in rabbit whole antiserum (C 8784, Sigma-Aldrich, Saint Louis, MO, USA). Cross reactions of the Anti-CORT antibody were: 11-deoxycorticosterone 20%, progesterone 15.7%,  $20\alpha$ -hydroxyprogesterone 8.8%, testosterone 7.9%,  $20\beta$ -hydroxyprogesterone 5.2%, cortisol 4.5%, aldosterone 4.4%, cortisone 3.2%, androstenedione 2.6%, 17-hydroxyprogesterone 1.8%,  $5\alpha$ -dehydrotestosterone 1.4%, androsterone  $<0.1\%$ , estrone  $<0.1\%$ , and estriol  $<0.1\%$ . Samples were run in two assays (intra-assay variation: 7.07%, inter-assay variation: 9.99%).

We removed from analyses two females from which we failed to collect blood during the second sampling session. We did not find any significant influence of time of day or body temperature on CORT levels (all  $p > 0.115$ ) and thus did not include these covariates in the analyses of CORT levels.

### *Offspring growth*

On the day of birth, we measured offspring snout-vent length (SVL  $\pm$  0.1cm) and jaw length (JL  $\pm$  0.1mm) respectively with a tape measure and digital caliper (Digimatic caliper 150mm, Mitutoyo, Japan). We did not observe any difference in offspring SVL or JL at birth (all  $p > 0.574$ ; Dupoué et al., 2015a). Each neonate was singly housed in a plastic box (30 x 16 x 10 cm) with a natural thermal gradient ( $20$ - $33^{\circ}\text{C}$ ) and water *ad libitum*. We then repeated the

morphological measures after two weeks (mean  $\pm$  SE: 13.9  $\pm$  0.3 days) in order to determine offspring early growth which is energetically supported solely by body reserves. We calculated body and jaw growth ( $\text{mm}\cdot\text{day}^{-1}$ ) as the difference between final and birth measurements divided by the number of days between measurements. One offspring born from a control female displayed several morphological abnormalities and died 9 days after birth and was not included in the growth analyses.

### *Statistical analyses*

All analyses were performed using R software (R Development Core Team, 2011). We checked that residuals of our models respected normality (Shapiro-Wilk test).

We analyzed the effect of water deprivation on baseline CORT level using a linear mixed model with baseline CORT level as the dependent variable, sampling session (initial vs. final), hydric treatment (control vs. water-deprived), reproductive status (pregnant vs. non-reproductive), and double and triple interactions between these terms as explanatory factors. Female identity was set as a random factor since measures were repeated between sampling sessions. We compared inter- and intra-group differences in baseline CORT level using *post hoc* tests of Tukey on the triple interaction (package *lsmeans*). Stress-induced CORT level was analyzed with the same design as above. We used two sets of models: the first in which we did not adjust stress-induced CORT with baseline CORT level and the second in which we added the baseline CORT level as a linear covariate.

We used linear models to test the relationship between changes from baseline or absolute stress-induced CORT level and changes in osmolality within pregnant and non-reproductive females. Hydric treatment significantly impacted plasma osmolality (Dupoué et al., 2015a), and we avoided a co-linearity issue by not including treatment in the model.

We used linear models to test the influence of the estimates of maternal reproductive effort (litter size, fit litter size, litter mass, fit litter mass, RLS, RFLS, RLM, and RFLM) on changes from baseline or absolute stress-induced CORT levels within each hydric treatment. Hydric treatment was treated as an explanatory factor and each estimate of maternal reproductive effort as linear covariates.



We used linear mixed models to compare the effect of female hydric treatment on offspring growth, with body or jaw growth as dependent variable and mother treatment as explanatory factor. Female identity was set as a random factor because siblings are not statistically independent (Massot et al., 1994).

Finally, we used a linear mixed model to test the relationship between offspring body growth or jaw growth and changes in maternal osmolality or changes from baseline or absolute stress-induced CORT level. Hydric treatment significantly impacted offspring growth (see results), and we avoided a co-linearity issue by not including treatment in the model.

## Results

### *Impact of water deprivation and reproductive status on plasma osmolality*

As previously reported (Dupoué et al. 2015a), plasma osmolality increased in water-deprived pregnant (mean  $\pm$  SE: from  $321.8 \pm 2.4$  to  $385.1 \pm 5.4$  mOsm.kg<sup>-1</sup>) and non-reproductive females (mean  $\pm$  SE: from  $307.2 \pm 3.4$  to  $342.9 \pm 6.0$  mOsm.kg<sup>-1</sup>), while no significant change was observed in their respective controls (mean  $\pm$  SE, pregnant: from  $322.0 \pm 3.6$  to  $324.8 \pm 3.2$  mOsm.kg<sup>-1</sup>, and non-reproductive: from  $321.3 \pm 3.6$  to  $324.1 \pm 4.0$  mOsm.kg<sup>-1</sup>).

### *Impact of water deprivation and reproductive status on CORT levels*

Baseline CORT level was significantly influenced by sampling session and reproductive status, but not by the hydric treatment (Table 1). We did not find a significant influence of any of the double interactions, but did find a significant influence of the triple interaction (Table 1), highlighting different baseline CORT levels between sampling sessions. Inter-group comparisons showed no effect of reproductive status and hydric treatment on baseline CORT level (Table 2). Intra-group analyses showed a significant increase in baseline CORT level through the treatment period in pregnant females from the water-deprived treatment (Table 2, Fig. 1A). Baseline CORT level did not significantly change through the treatment period in all other groups (Table 2, Fig. 1A, B).

Stress-induced CORT level was significantly influenced by the sampling session and marginally by the reproductive status, but it was not influenced by the hydric treatment (Table 1). We found a significant impact of the interaction between sampling session and treatment on stress-induced CORT level (Table 1), suggesting the sampling session differentially affected the stress-responses of control and water-deprived females. The triple interaction

significantly influenced stress-induced CORT level (Table 1), highlighting different baseline CORT levels between sampling sessions for pregnant and non-reproductive females from the control or the water-deprived treatment.

Inter- and intra-group analyses on stress-induced CORT level revealed the same statistical differences as the analyses of baseline CORT level. That is, there were no differences at either the onset or end of water deprivation between control and water-deprived females regardless of reproductive status (Table 2) and a significant increase of stress-induced CORT level only in water-deprived pregnant females (Table 2, Fig. 1A, B). When adjusted for the baseline CORT level, stress-induced CORT level was not significantly influenced by any factors (Table 1) except the interaction between sampling session and treatment as above (Table 1). Similarly, inter- and intra-group analyses were all non-significant (Table 2).

#### *Determinant of changes in CORT levels*

In pregnant females, we found that both changes in baseline and changes in stress-induced CORT levels were correlated with changes in osmolality (respectively,  $F_{1,26} = 8.4$ ,  $p = 0.007$ , Fig. 2A and  $F_{1,25} = 32.2$ ,  $p < 0.001$ , Fig. 2B). In non-reproductive females, no relation was found (all  $p > 0.582$ , Fig. 3A, B).

When considering control pregnant females, we found that changes in baseline CORT level were negatively correlated with fit litter size ( $t = -2.2$ ,  $p = 0.036$ ) or RFLS ( $t = -2.1$ ,  $p = 0.045$ , Fig. 4A), but not with other estimates of reproductive effort (all  $p > 0.127$ ). No relationship between changes in baseline CORT level and the different estimates of maternal reproductive effort was found among water-deprived females (all  $p > 0.232$ ). Changes in stress-induced CORT level were not correlated to the different estimates of maternal reproductive effort either for control (all  $p > 0.126$ ) or water-deprived females (all  $p > 0.133$ ) (Fig. 4B).

#### *Impacts of water deprivation on offspring growth*

We found a significant effect of water deprivation during pregnancy on both offspring body growth ( $F_{1,23} = 7.1$ ,  $p = 0.014$ , Fig. 5A) and jaw growth ( $F_{1,23} = 7.8$ ,  $p = 0.010$ , Fig. 5B). Compared to offspring from control females, offspring from water-deprived females showed greater body growth (Fig. 5A) and jaw growth (Fig. 5B).

We found a positive relationship between changes in maternal osmolality and offspring body growth ( $F_{1,22} = 6.7$ ,  $p = 0.017$ , Fig. 6) or jaw growth ( $F_{1,22} = 8.1$ ,  $p = 0.009$ , Fig. 6). We also found a positive relationship between changes in maternal baseline CORT levels and offspring body growth ( $F_{1,22} = 4.4$ ,  $p = 0.047$ , Fig. 6). However, we did not find any relationships between changes in stress-induced CORT levels and offspring body growth or jaw growth (all  $p > 0.184$ ).

## Discussion

Water is a vital resource that can profoundly affect animal behavior and performance (Davis and DeNardo, 2009; Lorenzon et al., 1999; McKechnie and Wolf, 2010; Moeller et al., 2013; Prates et al., 2013), yet it is often overlooked in ecophysiological studies (Bonnet and Brischoux, 2008). For instance, while CORT is a well-established mediator of allostasis, the effects of water restriction on CORT secretion remain relatively unknown. In this study, we investigated the effects of water deprivation on plasma CORT levels in pregnant and non-reproductive aspik vipers, as well as on offspring traits. We found that water deprivation led to higher CORT levels (both baseline and stress-induced levels) in pregnant females, and that CORT changes were correlated to changes in female plasma osmolality and maternal reproductive effort. We also found that water deprivation was correlated to greater offspring growth, which was positively correlated to maternal dehydration and changes in baseline CORT.

### *Water deprivation influences CORT levels in pregnant females*

As pregnant females become dehydrated as a result of water deprivation, they experience a significant elevation in baseline and stress-induced CORT levels. This response was not observed in water-deprived non-reproductive females even though they experienced a significant, but less dramatic, increase in osmolality (Dupoué et al., 2015a). This suggests increased physiological demands during pregnancy. Notably, pregnant females have an increased rate of evaporative water loss (Dupoué et al., 2015b; Webber et al., 2015) and they also have to provide water to the developing embryos (Dauphin-Villemant and Xavier, 1986; Lourdais et al., 2015). These increased demands on water may lead to water constraints if water availability is limited. This could explain why the increase in osmolality of water-deprived pregnant females was twice that of water-deprived non-reproductive females (Dupoué et al., 2015a). Although we expected dehydration to increase CORT levels in non-reproductive females, this result is consistent with previous studies on non-breeding reptiles

in which CORT does not appear to be involved in the regulation of water balance *per se* (Bradshaw and Rice, 1981; Dauphin-Villemant and Xavier, 1986; Dupoué et al., 2014). Supporting specific effects of dehydration on CORT levels, we found that changes in baseline CORT levels were positively correlated to changes in osmolality in pregnant females, but not in non-reproductive ones.

We propose two non-exclusive hypotheses to explain the increase in baseline CORT level of water-deprived pregnant females. CORT may be involved in the transfer of maternal body water to the developing embryos. For instance, at baseline levels CORT is involved in energy allocation (Landys et al., 2006; Romero, 2004; Wingfield et al., 1998) and might have the same function in water allocation. Alternatively, the increase in baseline CORT level in response to water deprivation could reflect an acute physiological stress generated by high gestational water demand in this species (i.e., high allostatic load or allostatic overload). However, the lack of a significant CORT increase in non-reproductive water-deprived females suggests the need for a threshold of dehydration before the activation of the central nervous system (i.e., hypothalamo-pituitary-adrenal axis). Further experiments manipulating CORT levels are necessary to clarify the role of CORT in water transfer during pregnancy and to determine if CORT is secreted at a given dehydration threshold.

#### *CORT levels and maternal reproductive effort*

In pregnant control females, changes in baseline CORT level negatively correlate with two estimates of maternal reproductive effort (i.e., fit litter size and RFLS), while there was no relation in water-deprived females. Previous studies have demonstrated either positive (Bonier et al., 2011) or negative relationships between CORT and reproductive effort (Angelier et al., 2010; Bonier et al., 2009b). A negative relationship between baseline CORT and reproductive effort is consistent with the CORT-fitness hypothesis (Bonier et al., 2009a; Bonier et al., 2009b) that posits that high baseline CORT level is associated with lower reproductive success. Alternatively, the negative relationship between baseline CORT level and maternal reproductive effort in control females might reflect a dilution of plasma CORT concentrations due to an increase of maternal body water. Female drinking behavior is correlated to fecundity in aspik vipers (Dupoué et al., 2015a; Lourdais et al., 2015), which might passively decrease baseline CORT concentration in fecund females. Such passive effect of maternal reproductive effort is however unlikely here because it should have also impacted

the stress-induced CORT level. Further experiments are required to investigate the long-term relationship of baseline CORT level and reproductive performance.

#### *Water deprivation effect on offspring growth*

We found significant effects of mother treatment on offspring growth and positive influences of both maternal hydration state and baseline CORT on offspring growth. Together, these results suggest that the dehydration induced by water deprivation might have increased maternal CORT levels which influenced offspring developmental trajectories. In support of this, previous experimental studies on wild vertebrates have shown either positive (Chin et al., 2009; Dantzer et al., 2013) or negative (Hayward and Wingfield, 2004; Lesage et al., 2001; Meylan and Clobert, 2005) effects of maternal GC increase on offspring growth. CORT is typically involved in energy allocation (Landys et al., 2006; Romero, 2004; Wingfield et al., 1998). Therefore, maternal CORT might have favored residual yolk mobilization by offspring resulting in increased growth. Maternal CORT may also have influenced offspring behavior (Robert et al., 2009; Wilcoxon and Redei, 2007) increasing for example their drinking behavior and enhancing yolk conversion in somatic tissues (Belinsky et al., 2004; Thompson and Speake, 2003). However, we did not monitor offspring drinking behavior and therefore we cannot determine whether this component was involved in accelerated growth.

In past decades, the early influence of the maternal environment on offspring phenotypes (i.e., maternal effects) have been extensively documented (Mousseau and Fox, 1998; Mousseau et al., 2009). Importantly, depending on the environmental context, mother may adjust the offspring phenotype in ways that favor (or not) its fitness (Groothuis and Schwabl, 2008; Groothuis et al., 2005; Marshall and Uller, 2007; Monaghan, 2008; Sinervo and DeNardo, 1996). Here, we cannot assess whether higher offspring growth is an adaptive response to perturbation of mother water balance because we have not considered other indicators of fitness (e.g., survival, age and size at maturity; Roff, 1992; Stearns, 1992). Yet, accelerated juvenile growth could result in different selective advantages (anti-predator, competitive and/or dispersal; reviewed in Arendt, 1997). Moreover, jaw size is a major trait that affects feeding performance in neonates (Forsman and Lindell, 1993). Previous studies demonstrated that jaw growth can depend on developmental conditions such as temperature (Lorioux et al., 2012), and plasticity in jaw growth may be ecologically relevant (Aubret et al., 2004; Forsman, 1996). In a previous long-term field study, Marquis et al., (2008) demonstrated that level of precipitation (i.e., water availability) positively influences reproductive performance of female common lizard, *Zootoca vivipara* (i.e., litter size, offspring size and survival).

However, fast growth can also mediate delayed costs (Gotthard, 2000; Metcalfe and Monaghan, 2001), and further studies are now required to model the effects of decreasing precipitation intensity and frequency on animal growth and survival.

### *Conclusion*

Currently, a major objective of ecophysiologicalists is to determine the functional responses of organisms to rapid environmental changes (Bozinovic and Pörtner, 2015; Dillon et al., 2010; Todgham and Stillman, 2013). Drought frequency and intensity are expected to increase due to global change (IPCC 2014), so investigations into the impacts of water restriction on animal physiological and behavioral adjustments is crucial. Such an understanding would allow the inclusion of species responses (behavioral adjustments, physiological limits, etc.) in predictive models (Huey et al., 2012; McCluney et al., 2012; McKechnie and Wolf, 2010). Although our results suggest that reproductively active individuals may be particularly impacted by dehydration as demonstrated for other vertebrates (Hirschhorn et al., 1969; Rittenhouse et al., 2009), parental effects may influence offspring physiology and behavior (Lorenzon et al., 1999; Lorenzon et al., 2001; Marquis et al., 2008). Future work could specifically investigate the potential role for parental effects in mediating the impacts of adverse hydric conditions on offspring fitness.

### **List of symbols and abbreviations**

BM: body mass

CORT: corticosterone

GCs: glucocorticoids

RLS: relative litter size

RFLS: relative fit litter size

RLM: relative litter mass

RFLM: relative fit litter mass

SVL: snout-vent length

$\Delta$ : change in mother physiological trait after the water deprivation period

## **Acknowledgments**

We thank Gaëtan Guiller for his help with snake captures. We thank Stéphanie Ruault for her significant help with the corticosterone assay. We are grateful to Christian Wright for performing the osmolality assays.

## **Competing interests**

We declare having no competing nor financial interest

## **Author contributions**

A.D. contributed to all aspects of this study with conception, designing and executing experiments or analyses, and drafting and revising the article. F.A. contributed to the execution of experiments or analyses, and drafting and revising the article. F.B. contributed to the execution of experiments or analyses, and drafting and revising the article. D.F.D. contributed to the execution of experiments or analyses, and drafting and revising the article. C.T. contributed to the execution of experiments. C.P. contributed to the execution of experiments. O.L. contributed to all aspects of this study with conception, designing and executing experiments or analyses, and drafting and revising the article.

## **Funding**

Financial support was provided by the Région Poitou-Charentes, the Département des Deux-Sèvres, the Projet BOCAGE, and the Centre National de la Recherche Scientifique (CNRS).

## References

- Angelier, F. and Wingfield, J. C.** (2013). Importance of the glucocorticoid stress response in a changing world: theory, hypotheses and perspectives. *Gen. Comp. Endocrinol.* **190**, 118–128.
- Angelier, F., Wingfield, J. C., Weimerskirch, H. and Chastel, O.** (2010). Hormonal correlates of individual quality in a long-lived bird: a test of the “corticosterone – fitness hypothesis.” *Biol. Lett.* **6**, 846–849.
- Aragón, P., Rodríguez, M. A., Olalla-Tárraga, M. A. and Lobo, J. M.** (2010). Predicted impact of climate change on threatened terrestrial vertebrates in central Spain highlights differences between endotherms and ectotherms. *Anim. Conserv.* **13**, 363–373.
- Arendt, J. D.** (1997). Adaptive intrinsic growth rates: an integration across taxa. *Q. Rev. Biol.* **72**, 149–177.
- Aubret, F., Shine, R. and Bonnet, X.** (2004). Adaptive developmental plasticity in snakes. *Nature* **431**, 261–262.
- Belinsky, A., Ackerman, R. A., Dmi’el, R. and Ar, A.** (2004). Water in reptilian eggs and hatchlings. In *Reptilian Incubation: Environment Evolution and Behaviour* (ed. Deeming, D. C.), pp. 125–141. Nottingham, UK: Nottingham University Press.
- Belliure, J., Meylan, S. and Clobert, J.** (2004). Prenatal and postnatal effects of corticosterone on behavior in juveniles of the common lizard, *Lacerta vivipara*. *J. Exp. Zool. Part A Comp. Exp. Biol.* **301**, 401–410.
- Bentley, P. J.** (2002). *Endocrines and osmoregulation. Zoophysiology*. Berlin: Springer Verlag.
- Berger, S., Martin, L. B., Wikelski, M., Romero, L. M., Kalko, E. K. V, Vitousek, M. N. and Rödl, T.** (2005). Corticosterone suppresses immune activity in territorial Galápagos marine iguanas during reproduction. *Horm. Behav.* **47**, 419–429.
- Blount, J. D., Vitikainen, E. I. K., Stott, I. and Cant, M. A.** Oxidative shielding and the cost of reproduction. *Biol. Rev.* in press
- Bonier, F., Moore, I. T., Martin, P. R. and Robertson, R. J.** (2009a). The relationship between fitness and baseline glucocorticoids in a passerine bird. *Gen. Comp. Endocrinol.* **163**, 208–213.
- Bonier, F., Martin, P. R., Moore, I. T. and Wingfield, J. C.** (2009b). Do baseline glucocorticoids predict fitness? *Trends Ecol. Evol.* **24**, 634–642.
- Bonier, F., Moore, I. T. and Robertson, R. J.** (2011). The stress of parenthood? Increased glucocorticoids in birds with experimentally enlarged broods. *Biol. Lett.* **7**, 944–946.



- Bonnet, X. and Brischoux, F.** (2008). Thirsty sea snakes forsake refuge during rainfall. *Austral Ecol.* **33**, 911–921.
- Bonnet, X., Bradshaw, D. and Shine, R.** (1998). Capital versus income breeding: an ectothermic perspective. *Oikos* **83**, 333–342.
- Bonnet, X., Naulleau, G., Shine, R. and Lourdais, O.** (2001). Short-term versus long-term effects of food intake on reproductive output in a viviparous snake, *Vipera aspis*. *Oikos* **92**, 297–308.
- Bonnet, X., Shine, R., Lourdais, O. and Naulleau, G.** (2003). Measures of reproductive allometry are sensitive to sampling bias. *Funct. Ecol.* **17**, 39–49.
- Bozinovic, F. and Pörtner, H.-O.** (2015). Physiological ecology meets climate change. *Ecol. Evol.* **5**, 1025–1030.
- Bradshaw, S. D. and Rice, G. E.** (1981). The effects of pituitary and adrenal hormones on renal and postrenal reabsorption of water and electrolytes in the lizard, *Varanus gouldii* (Gray). *Gen. Comp. Endocrinol.* **44**, 82–93.
- Breuner, C. W., Patterson, S. H. and Hahn, T. P.** (2008). In search of relationships between the acute adrenocortical response and fitness. *Gen. Comp. Endocrinol.* **157**, 288–295.
- Brischoux, F., Lendvai, Á. Z., Bókony, V., Chastel, O. and Angelier, F.** (2015). Marine lifestyle is associated with higher baseline corticosterone levels in birds. *Biol. J. Linn. Soc.* **115**, 154–161.
- Chin, E. H., Love, O. P., Verspoor, J. J., Williams, T. D., Rowley, K. and Burness, G.** (2009). Juveniles exposed to embryonic corticosterone have enhanced flight performance. *Proc. R. Soc. B Biol. Sci.* **276**, 499–505.
- Coslovsky, M. and Richner, H.** (2011). Predation risk affects offspring growth via maternal effects. *Funct. Ecol.* **25**, 878–888.
- Dantzer, B., Newman, A. E. M., Boonstra, R., Palme, R., Humphries, M. M. and McAdam, A. G.** (2013). Density triggers maternal hormones that increase adaptive offspring growth in a wild mammal. *Science* (80-. ). **340**, 1215–1217.
- Dauphin-Villemant, C. and Xavier, F.** (1986). Adrenal activity in the females *Lacerta vivipara* Jacquin: possible involvement in the success of gestation. In *Endocrine regulation as adaptive mechanism to environment* (ed. Assemacher, I. and Boissin, J.), pp. 241–250. Paris: CNRS.
- Davis, J. R. and Denardo, D. F.** (2009). Water supplementation affects the behavioral and physiological ecology of gila monsters (*Heloderma suspectum*) in the sonoran desert. *Physiol. Biochem. Zool.* **82**, 739–748.
- Dillon, M. E., Wang, G. and Huey, R. B.** (2010). Global metabolic impacts of recent climate warming. *Nature* **467**, 704–706.

- Duggan, R. T. and Lofts, B.** (1978). Adaptation to fresh water in the sea snake *Hydrophis cyanocinctus*: tissue electrolytes and peripheral corticosteroids. *Gen. Comp. Endocrinol.* **36**, 510–520.
- Dupoué, A. and Lourdais, O.** (2014). Relative reproductive effort drives metabolic changes and maternal emaciation during pregnancy in a viviparous snake. *J. Zool.* **293**, 49–56.
- Dupoué, A., Brischoux, F., Lourdais, O. and Angelier, F.** (2013). Influence of temperature on the corticosterone stress-response: an experiment in the Children's python (*Antaresia childreni*). *Gen. Comp. Endocrinol.* **193**, 178–184.
- Dupoué, A., Angelier, F., Lourdais, O., Bonnet, X. and Brischoux, F.** (2014). Effect of water deprivation on baseline and stress-induced corticosterone levels in the Children's python (*Antaresia childreni*). *Comp. Biochem. Physiol. Part A Mol. Integr. Physiol.* **168**, 11–16.
- Dupoué, A., Brischoux, F., Angelier, F., DeNardo, D. F., Wright, C. D. and Lourdais, O.** (2015a). Intergenerational trade-off for water may induce a mother-offspring conflict in favour of embryos in a viviparous snake. *Funct. Ecol.* **29**, 414–422.
- Dupoué, A., Stahlschmidt, Z. R., Michaud, B. and Lourdais, O.** (2015b). Physiological state influences evaporative water loss and microclimate preference in the snake *Vipera aspis*. *Physiol. Behav.* **144**, 82–89.
- Ellenberg, U., Setiawan, A. N., Cree, A., Houston, D. M. and Seddon, P. J.** (2007). Elevated hormonal stress response and reduced reproductive output in Yellow-eyed penguins exposed to unregulated tourism. *Gen. Comp. Endocrinol.* **152**, 54–63.
- Eriksen, M. S., Espmark, A., Braastad, B. O., Salte, R. and Bakken, M.** (2007). Long-term effects of maternal cortisol exposure and mild hyperthermia during embryogeny on survival, growth and morphological anomalies in farmed Atlantic salmon *Salmo salar* offspring. *J. Fish Biol.* **70**, 462–473.
- Forsman, A.** (1996). An experimental test for food effects on head size allometry in juvenile snakes. *Evolution (N. Y.)* **50**, 2536–2542.
- Forsman, A. and Lindell, L. E.** (1993). The advantage of a big head: swallowing performance in Adders, *Vipera berus*. *Funct. Ecol.* **7**, 183–189.
- French, S. S., Denardo, D. F. and Moore, M. C.** (2007). Trade-Offs between the reproductive and immune systems: facultative responses to resources or obligate responses to reproduction? *Am. Nat.* **170**, 79–89.
- Gotthard, K.** (2000). Increased risk of predation as a cost of high growth rate: An experimental test in a butterfly. *J. Anim. Ecol.* **69**, 896–902.
- Groothuis, T. G. G. and Schwabl, H.** (2008). Hormone-mediated maternal effects in birds: mechanisms matter but what do we know of them? *Philos. Trans. R. Soc. Lond. B. Biol. Sci.* **363**, 1647–1661.

- Groothuis, T. G. G., Muller, W., von Engelhardt, N., Carere, C. and Eising, C.** (2005). Maternal hormones as a tool to adjust offspring phenotype in avian species. *Neurosci. Biobehav. Rev.* **29**, 329–352.
- Hayward, L. S. and Wingfield, J. C.** (2004). Maternal corticosterone is transferred to avian yolk and may alter offspring growth and adult phenotype. *Gen. Comp. Endocrinol.* **135**, 365–371.
- Hirschhorn, N., Chowdhury, A. A. K. M. and Lindenbaum, J.** (1969). Cholera in pregnant women. *Lancet* **293**, 1230–1232.
- Huey, R. B., Kearney, M. R., Krockenberger, A., Holtum, J. A. M., Jess, M. and Williams, S. E.** (2012). Predicting organismal vulnerability to climate warming: roles of behaviour, physiology and adaptation. *Philos. Trans. R. Soc. Lond. B. Biol. Sci.* **367**, 1665–1679.
- Kitaysky, A. S., Piatt, J. F., Hatch, S. A., Kitaiskaia, E. V, Benowitz-Fredericks, Z. M., Shultz, M. T. and Wingfield, J. C.** (2010). Food availability and population processes: severity of nutritional stress during reproduction predicts survival of long-lived seabirds. *Funct. Ecol.* **24**, 625–637.
- Landys, M. M., Ramenofsky, M. and Wingfield, J. C.** (2006). Actions of glucocorticoids at a seasonal baseline as compared to stress-related levels in the regulation of periodic life processes. *Gen. Comp. Endocrinol.* **148**, 132–149.
- Lesage, J., Blondeau, B., Grino, M., Breant, B. and Dupouy, J. P.** (2001). Maternal undernutrition during late gestation induces overexposure to glucocorticoids and intrauterine growth retardation, and disturbs the hypothalamo-pituitary adrenal axis in the newborn rat. *Endocrinology* **142**, 1692–1702.
- Lorenzon, P., Clobert, J., Oppliger, A. and John-Alder, H.** (1999). Effect of water constraint on growth rate, activity and body temperature of yearling common lizard (*Lacerta vivipara*). *Oecologia* **118**, 423–430.
- Lorenzon, P., Clobert, J. and Massot, M.** (2001). The contribution of phenotypic plasticity to adaptation in *Lacerta vivipara*. *Evolution (N. Y.)* **55**, 392–404.
- Lorioux, S., DeNardo, D. F., Gorelick, R. and Lourdais, O.** (2012). Maternal influences on early development: preferred temperature prior to oviposition hastens embryogenesis and enhances offspring traits in the Children’s python, *Antaresia childreni*. *J. Exp. Biol.* **215**, 1346–1353.
- Lorioux, S., Vaugoyeau, M., Denardo, D. F., Clobert, J., Guillon, M. and Lourdais, O.** (2013a). Stage dependence of phenotypical and phenological maternal effects: insight into squamate reptile reproductive strategies. *Am. Nat.* **182**, 223–233.
- Lorioux, S., Lisse, H. and Lourdais, O.** (2013b). Dedicated mothers: predation risk and physical burden do not alter thermoregulatory behaviour of pregnant vipers. *Anim. Behav.* **86**, 401–408.

- Lormée, H., Jouventin, P., Trouvé, C. and Chastel, O.** (2003). Sex-specific patterns in baseline corticosterone and body condition changes in breeding Red-footed Boobies *Sula sula*. *Ibis (Lond. 1859)*. **145**, 212–219.
- Lourdais, O., Bonnet, X. and Doughty, P.** (2002a). Costs of anorexia during pregnancy in a viviparous snake (*Vipera aspis*). *J. Exp. Zool.* **292**, 487–493.
- Lourdais, O., Bonnet, X., Shine, R., DeNardo, D. F., Naulleau, G. and Guillon, M.** (2002b). Capital-breeding and reproductive effort in a variable environment: a longitudinal study of a viviparous snake. *J. Anim. Ecol.* **71**, 470–479.
- Lourdais, O., Lorigou, S., Dupoué, A., Wright, C. and DeNardo, D. F.** (2015). Embryonic water uptake during pregnancy is stage- and fecundity-dependent in the snake *Vipera aspis*. *Comp. Biochem. Physiol. Part A Mol. Integr. Physiol.* **189**, 102–106.
- Love, O. P., Madliger, C. L., Bourgeon, S., Semeniuk, C. A. D. and Williams, T. D.** (2014). Evidence for baseline glucocorticoids as mediators of reproductive investment in a wild bird. *Gen. Comp. Endocrinol.* **199**, 65–69.
- Magnhagen, C.** (1991). Predation risk as a cost of reproduction. *Trends Ecol. Evol.* **6**, 183–186.
- Marquis, O., Massot, M. and Le Galliard, J. F.** (2008). Intergenerational effects of climate generate cohort variation in lizard reproductive performance. *Ecology* **89**, 2575–2583.
- Marshall, D. J. and Uller, T.** (2007). When is a maternal effect adaptive? *Oikos* **116**, 1957–1963.
- Massot, M., Clobert, J., Chambon, A. and Michalakis, Y.** (1994). Vertebrate natal dispersal: the problem of non-independence of siblings. *Oikos* **70**, 172–176.
- McCluney, K. E., Belnap, J., Collins, S. L., Gonzalez, A. L., Hagen, E. M., Holland, J. N., Kotler, B. P., Maestre, F. T., Smith, S. D. and Wolf, B. O.** (2012). Shifting species interactions in terrestrial dryland ecosystems under altered water availability and climate change. *Biol. Rev.* **87**, 563–582.
- McCormick, S. D. and Bradshaw, D.** (2006). Hormonal control of salt and water balance in vertebrates. *Gen. Comp. Endocrinol.* **147**, 3–8.
- McEwen, B. S. and Wingfield, J. C.** (2003). The concept of allostasis in biology and biomedicine. *Horm. Behav.* **43**, 2–15.
- McEwen, B. S. and Wingfield, J. C.** (2010). What's in a name? Integrating homeostasis, allostasis and stress. *Horm. Behav.* **57**, 105–111.
- McKechnie, A. E. and Wolf, B. O.** (2010). Climate change increases the likelihood of catastrophic avian mortality events during extreme heat waves. *Biol. Lett.* **6**, 253–256.
- Metcalfe, N. B. and Monaghan, P.** (2001). Compensation for a bad start: Grow now, pay later? *Trends Ecol. Evol.* **16**, 254–260.

- Meylan, S. and Clobert, J.** (2004). Maternal effects on offspring locomotion: influence of density and corticosterone elevation in the lizard *Lacerta vivipara*. *Physiol. Biochem. Zool.* **77**, 450–458.
- Meylan, S. and Clobert, J.** (2005). Is corticosterone-mediated phenotype development adaptive? Maternal corticosterone treatment enhances survival in male lizards. *Horm. Behav.* **48**, 44–52.
- Meylan, S., Belliure, J., Clobert, J. and de Fraipont, M.** (2002). Stress and body condition as prenatal and postnatal determinants of dispersal in the common lizard (*Lacerta vivipara*). *Horm. Behav.* **42**, 319–326.
- Moeller, K. T., Butler, M. W. and Denardo, D. F.** (2013). The effect of hydration state and energy balance on innate immunity of a desert reptile. *Front. Zool.* **10**, 23–33.
- Monaghan, P.** (2008). Early growth conditions, phenotypic development and environmental change. *Philos. Trans. R. Soc. Lond. B. Biol. Sci.* **363**, 1635–1645.
- Mousseau, T. A. and Fox, C. W.** (1998). The adaptive significance of maternal effects. *Trends Ecol. Evol.* **13**, 403–407.
- Mousseau, T. A., Uller, T., Wapstra, E. and Badyaev, A. V.** (2009). Evolution of maternal effects: past and present. *Philos. Trans. R. Soc. Lond. B. Biol. Sci.* **364**, 1035–1038.
- Naulleau, G.** (1981). Détermination des périodes de l'ovulation chez *Vipera aspis* et *Vipera berus* dans l'ouest de la France, étudiée par radiographie. *Bull. la Société des Sci. Nat. l'Ouest la Fr.* **3**, 151–153.
- Prates, I., Jr, M. J. A., Wilson, R. S., Niehaus, A. C. and Navas, C. A.** (2013). Dehydration hardly slows hopping toads (*Rhinella granulosa*) from xeric and mesic environments. *Physiol. Biochem. Zool.* **86**, 451–457.
- Rittenhouse, T. A. G., Semlitsch, R. D. and Thompson, F. R.** (2009). Survival costs associated with wood frog breeding migrations: effects of timber harvest and drought. *Ecology* **90**, 1620–1630.
- Robert, K. A., Vleck, C. and Bronikowski, A. M.** (2009). The effects of maternal corticosterone levels on offspring behavior in fast- and slow-growth garter snakes (*Thamnophis elegans*). *Horm. Behav.* **55**, 24–32.
- Roff, D. A.** (1992). *Evolution of life histories: theory and analysis*. New York: Chapman & Hall.
- Romero, L. M.** (2004). Physiological stress in ecology: lessons from biomedical research. *Trends Ecol. Evol.* **19**, 249–255.
- Romero, L. M. and Wikelski, M.** (2001). Corticosterone levels predict survival probabilities of Galapagos marine iguanas during El Niño events. *Proc. Natl. Acad. Sci. U. S. A.* **98**, 7366–7370.

- Romero, L. M., Dickens, M. J. and Cyr, N. E.** (2009). The reactive scope model - a new model integrating homeostasis, allostasis, and stress. *Horm. Behav.* **55**, 375–389.
- Saino, N., Romano, M., Ferrari, R. P., Martinelli, R. and Møller, A. P.** (2005). Stressed mothers lay eggs with high corticosterone levels which produce low-quality offspring. *J. Exp. Zool. Part A Comp. Exp. Biol.* **303**, 998–1006.
- Sapolsky, R. M., Romero, L. M. and Munck, A. U.** (2000). How do glucocorticoids influence stress responses? Integrating permissive, suppressive, stimulatory, and preparative actions. *Endocr. Rev.* **21**, 55–89.
- Sinervo, B. and DeNardo, D. F.** (1996). Cost of reproduction in the wild: path analysis of natural selection and experimental tests of causation. *Evolution (N. Y.)* **50**, 1299–1313.
- Stearns, S. C.** (1992). *The evolution of life histories*. Oxford: Oxford University Press.
- Stewart, J. R. and Thompson, M. B.** (2000). Evolution of placentation among squamate reptiles: recent research and future directions. *Comp. Biochem. Physiol. Part A Mol. Integr. Physiol.* **127**, 411–431.
- Stier, A., Reichert, S., Massemin, S., Bize, P. and Criscuolo, F.** (2012). Constraint and cost of oxidative stress on reproduction: correlative evidence in laboratory mice and review of the literature. *Front. Zool.* **9**, 37–46.
- Tartu, S., Angelier, F., Herzke, D., Moe, B., Bech, C., Gabrielsen, G. W., Bustnes, J. O. and Chastel, O.** (2014). The stress of being contaminated? Adrenocortical function and reproduction in relation to persistent organic pollutants in female black legged kittiwakes. *Sci. Total Environ.* **476-477**, 553–560.
- Thompson, M. B. and Speake, B. K.** (2003). Energy and nutrient utilisation by embryonic reptiles. *Comp. Biochem. Physiol. Part A Mol. Integr. Physiol.* **133**, 529–538.
- Todgham, A. E. and Stillman, J. H.** (2013). Physiological responses to shifts in multiple environmental stressors: Relevance in a changing world. *Integr. Comp. Biol.* **53**, 539–544.
- Warner, D. A., Radder, R. S. and Shine, R.** (2009). Corticosterone exposure during embryonic development affects offspring growth and sex ratios in opposing directions in two lizard species with environmental sex determination. *Physiol. Biochem. Zool.* **82**, 363–371.
- Webber, M. M., Gibbs, a. G. and Rodríguez-Robles, J. a.** (2015). Hot and not-so-hot females: reproductive state and thermal preferences of female Arizona Bark Scorpions (*Centruroides sculpturatus*). *J. Evol. Biol.* **28**, 368–375.
- Wilcoxon, J. S. and Redei, E. E.** (2007). Maternal glucocorticoid deficit affects hypothalamic-pituitary-adrenal function and behavior of rat offspring. *Horm. Behav.* **51**, 321–327.

**Wingfield, J. C., Maney, D. L., Breuner, C. W., Jacobs, J. D., Lynn, S., Ramenofsky, M. and Richardson, R. D.** (1998). Ecological bases of hormone-behavior interactions: the “emergency life history stage.” *Am. Zool.* **38**, 191–206.

**Wright, C. D., Jackson, M. L. and DeNardo, D. F.** (2013). Meal consumption is ineffective at maintaining or correcting water balance in a desert lizard, *Heloderma suspectum*. *J. Exp. Biol.* **216**, 1439–1447.

**Zagron, G. and Weinstock, M.** (2006). Maternal adrenal hormone secretion mediates behavioural alterations induced by prenatal stress in male and female rats. *Behav. Brain Res.* **175**, 323–328.

## Figures

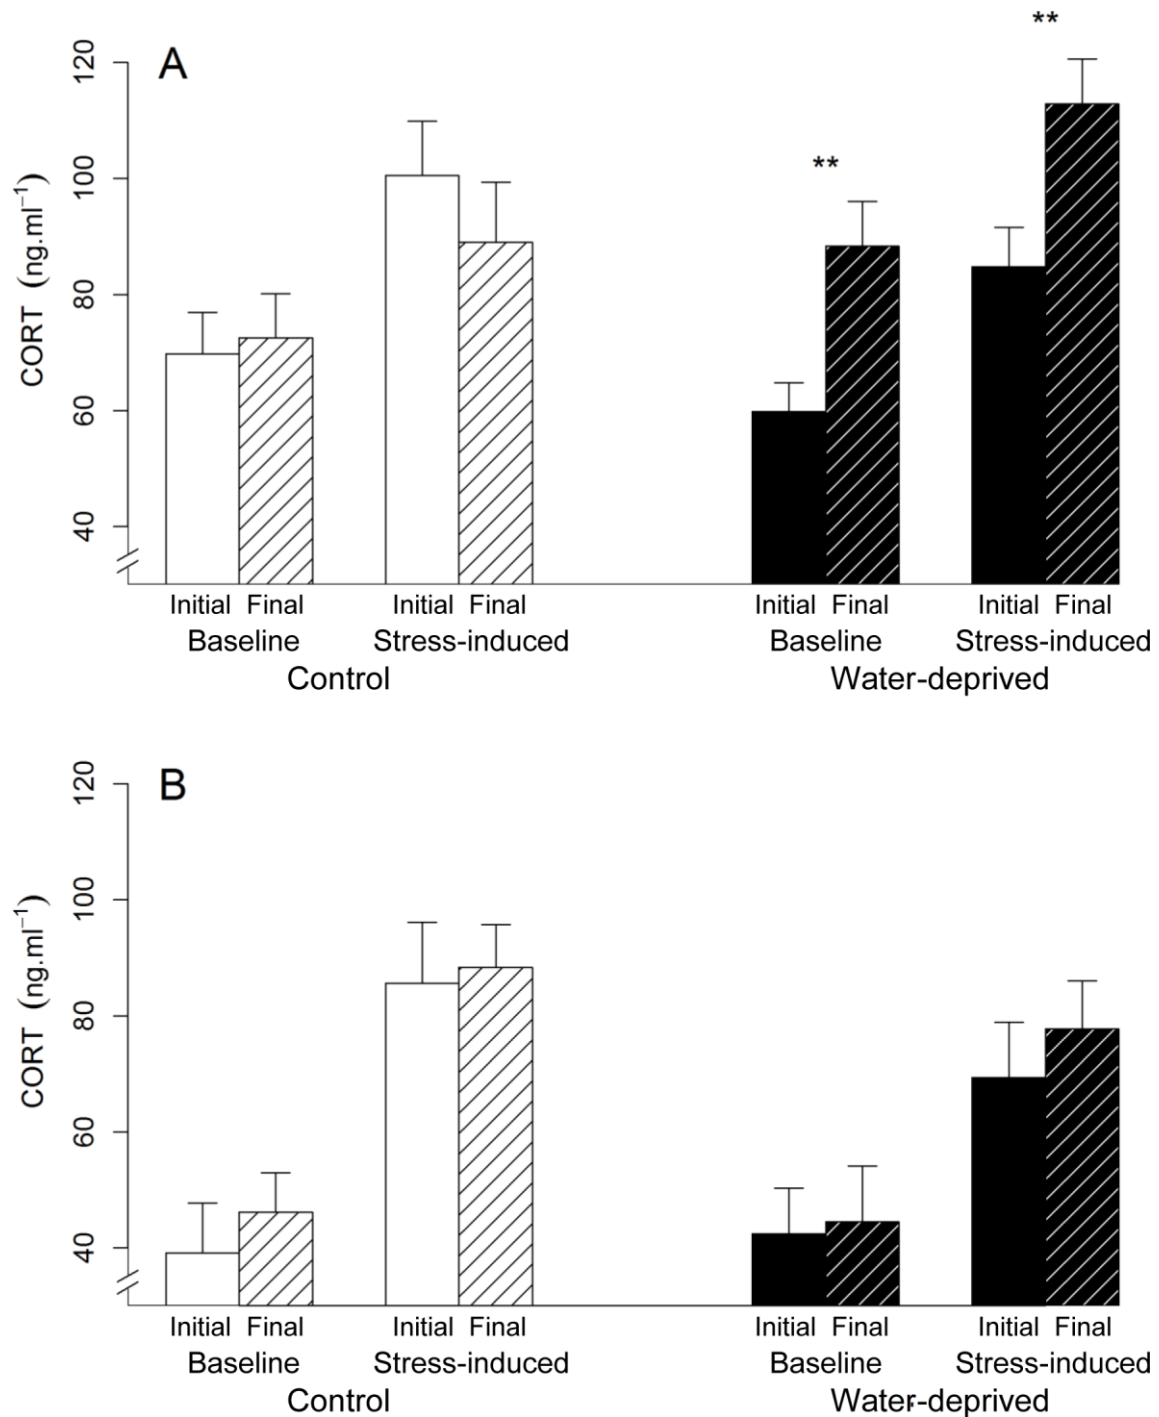

**Figure 1.** Effect of water deprivation and reproductive status on aspic viper CORT levels in A) pregnant and B) non-reproductive females. Bars represent means ( $\pm$  s.e.m.) of baseline and



stress-induced CORT levels during initial (full bars) and final (hatched bars) sampling sessions in females from the control (white bars, n = 15 pregnant, n = 14 non-reproductive) and the water-deprived treatment (black bars, n = 13 pregnant, n = 14 non-reproductive). Significant difference of CORT levels between initial and final sampling session is symbolized above bars: \*\* p < 0.01.

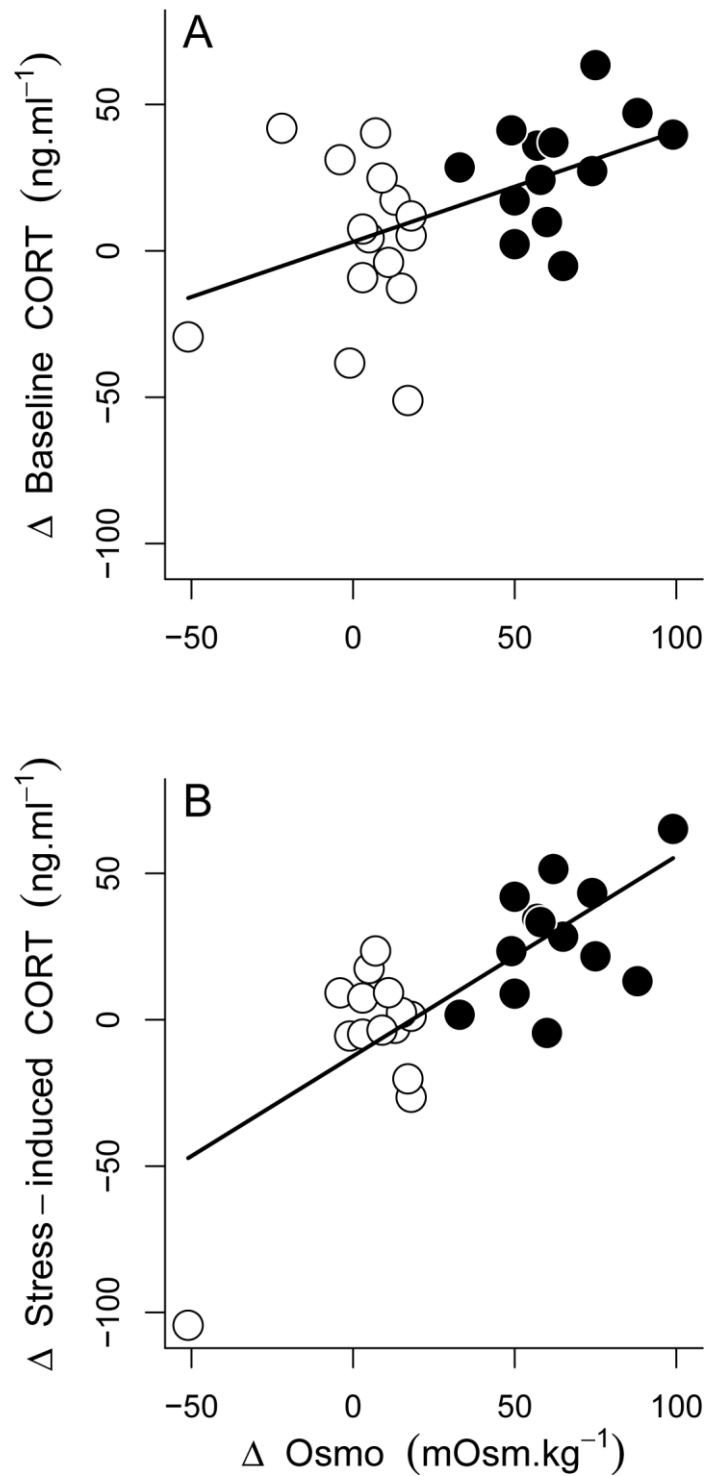

**Figure 2.** Relationships between changes in A) baseline and B) stress-induced CORT levels and changes in osmolality in pregnant females from the control (open circles,  $n = 15$ ) or water-deprived (filled circles,  $n = 13$ ) treatments. Correlation lines are included for significant relationship: changes in osmolality are positively correlated with changes in baseline CORT and with changes in stress-induced CORT.

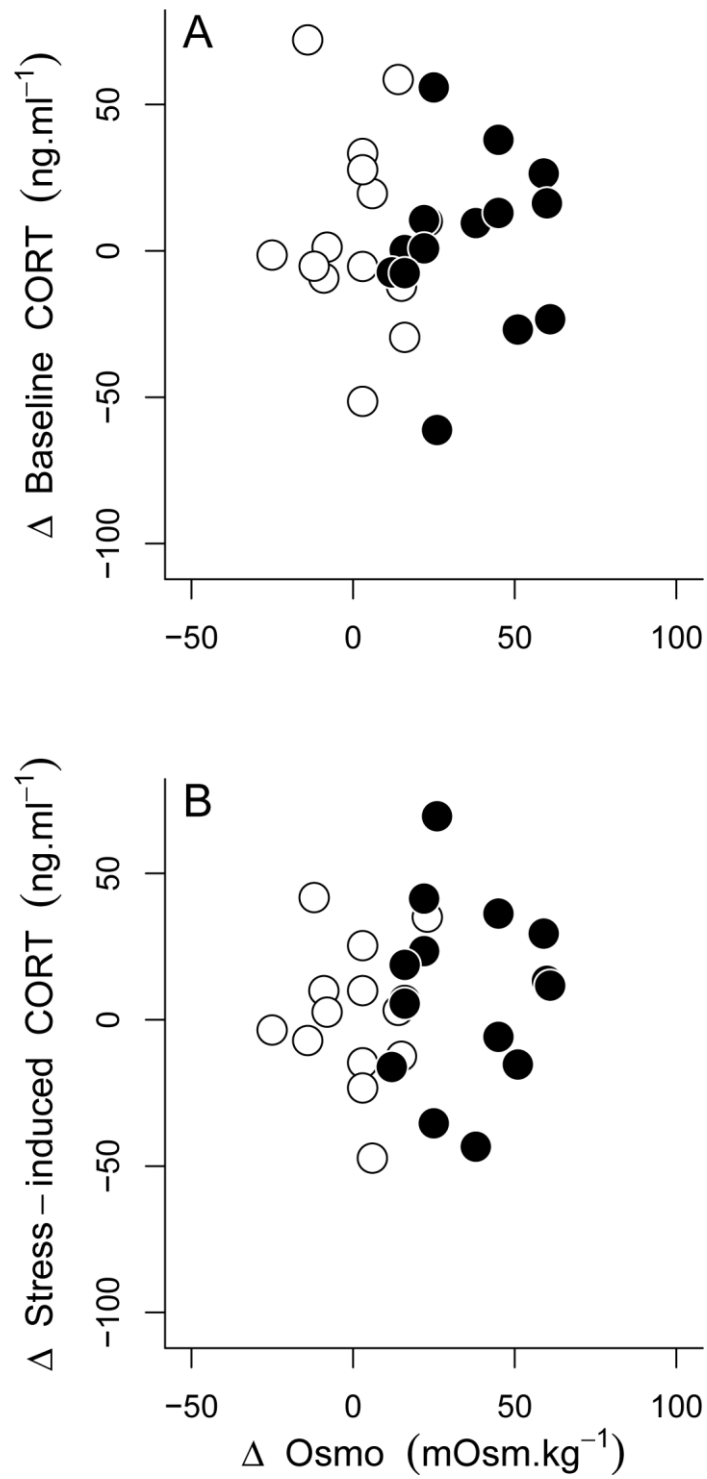

**Figure 3.** Relationships between changes in A) baseline and B) stress-induced CORT levels and changes in osmolality in non-reproductive females from the control (open circles, n = 14) or water-deprived (filled circles, n = 14) treatments.

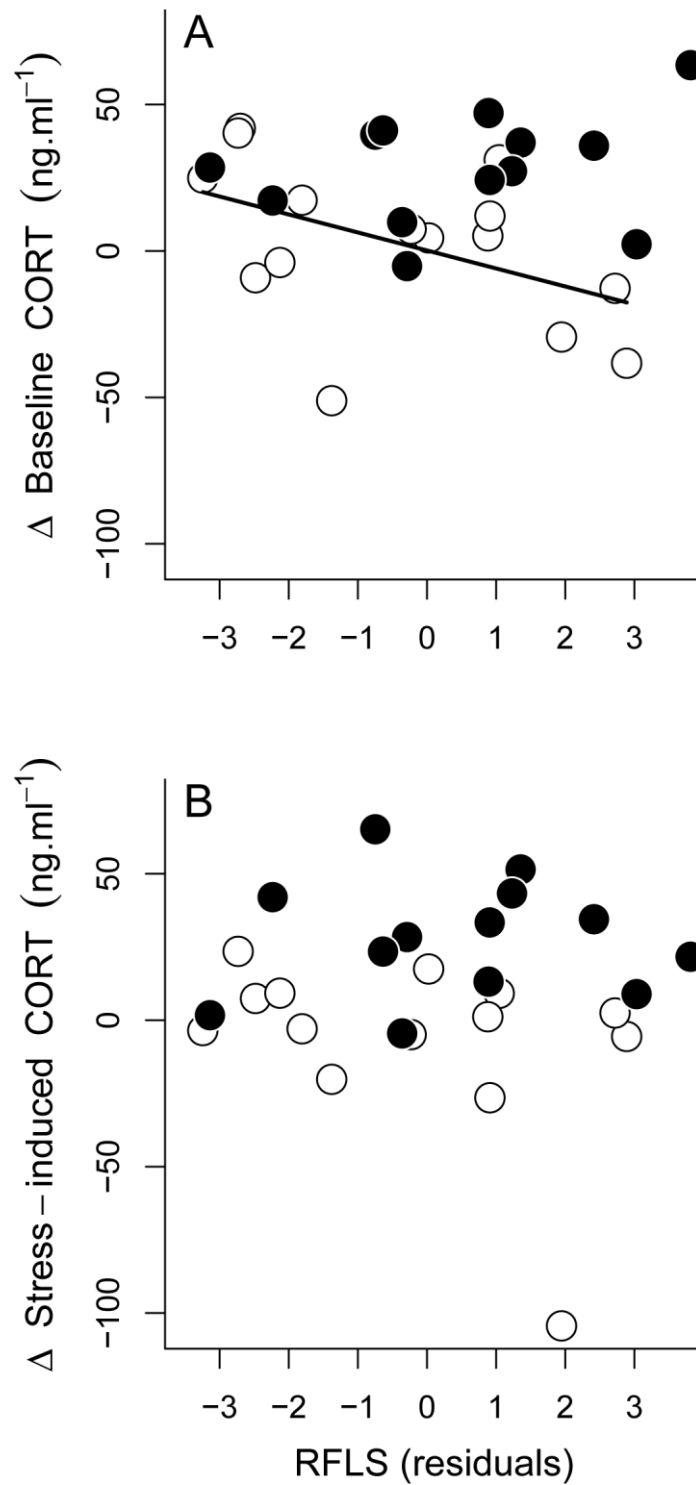

**Figure 4.** Relationships between changes in A) baseline or B) stress-induced CORT levels and maternal relative litter size (RFLS: residuals from the linear model of fit litter size against mother SVL) in pregnant females from the control (open circles,  $n = 15$ ) or the water-deprived (filled circles,  $n = 13$ ) treatments. The correlation line represents the only significant result where RFLS negatively influenced changes in baseline CORT levels in control females.

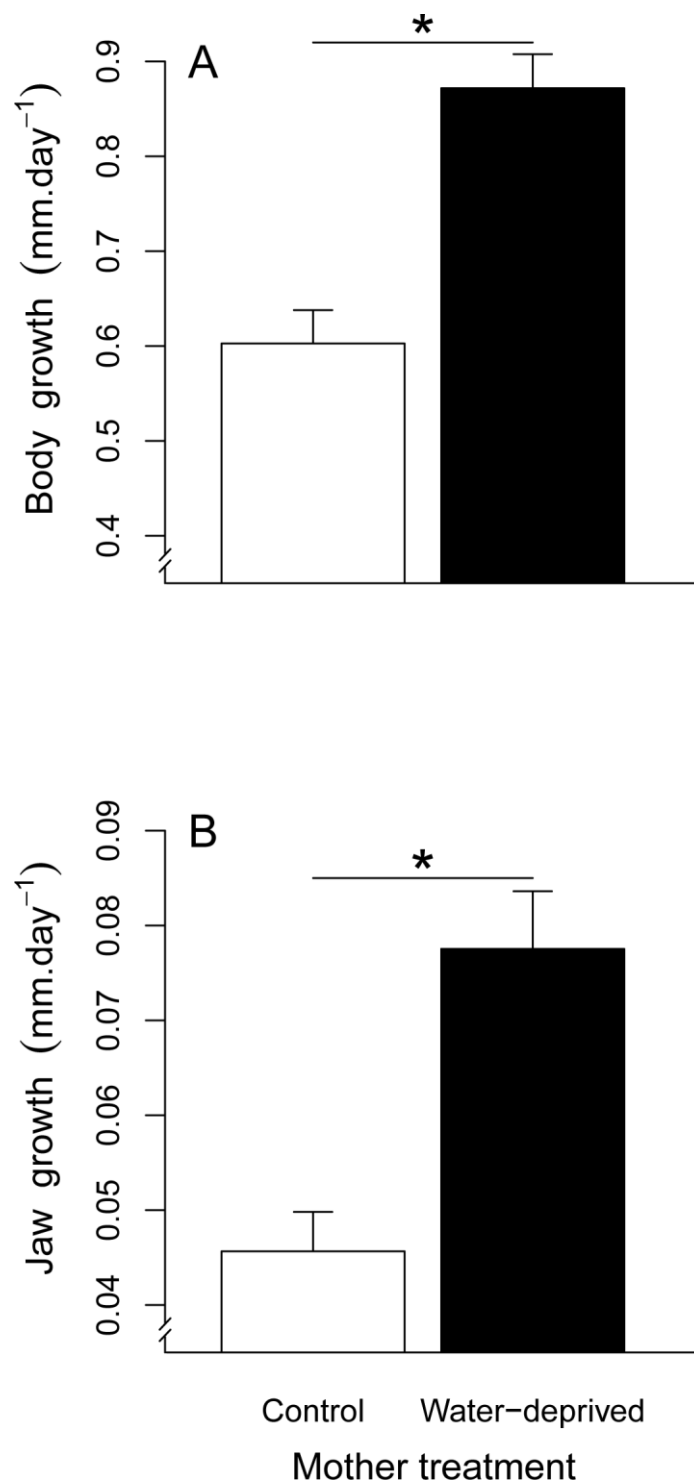

**Figure 5.** Effect of maternal hydric treatment on offspring growth two weeks after birth. Bars represent means ( $\pm$  s.e.m.) of A) body growth and B) jaw growth of offspring born to mothers from control (white bars,  $n = 60$ ) and water-deprived (black bars,  $n = 65$ ) treatments. Significant effect of hydric treatment is symbolized: \*  $p < 0.05$ .

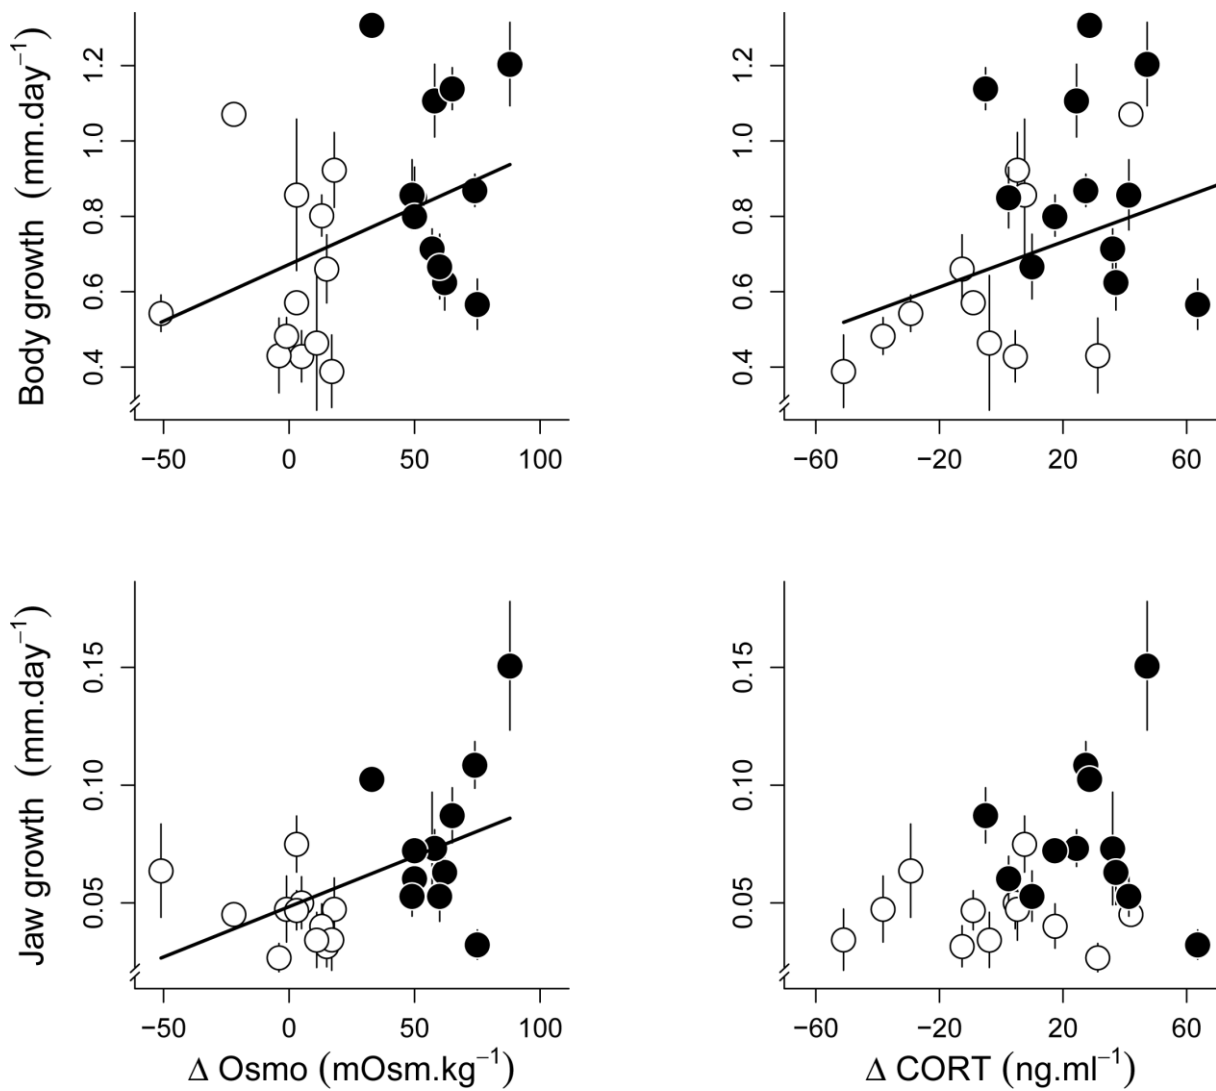

**Figure 6.** Relationships between offspring body growth (mean per litter  $\pm$  s.e.m., top panels) or jaw growth (mean per litter  $\pm$  s.e.m., bottom panels) and changes in mother osmolality ( $\Delta$  Osmo, left panels) or baseline CORT level ( $\Delta$  CORT, right panels). Trend lines are included for significant relationship.  $\Delta$  Osmo was correlated with offspring body growth and jaw growth.  $\Delta$  CORT was positively correlated with offspring body growth but not offspring jaw growth.

## Tables

**Table 1.** Mixed effects models (individuals set as random factor) were used to determine the impact of sampling session, hydric treatment, reproductive status, and interaction terms on baseline, absolute, and adjusted stress-induced CORT levels. In adjusted stress-induced CORT level analysis, baseline CORT is included as a linear covariate. Significance is symbolized: .  $p < 0.1$ , \*  $p < 0.05$ , \*\*  $p < 0.01$ , \*\*\*  $p < 0.001$ . See text for details.

| Variable                     | Factor                       | df   | F value | p-value |     |
|------------------------------|------------------------------|------|---------|---------|-----|
| Baseline CORT                | Intercept                    | 1,52 | 291.2   | < 0.001 | *** |
|                              | Session                      | 1,52 | 7.00    | 0.011   | *   |
|                              | Treatment                    | 1,52 | 0.01    | 0.905   |     |
|                              | Status                       | 1,52 | 19.01   | < 0.001 | *** |
|                              | Session x Treatment          | 1,52 | 1.88    | 0.176   |     |
|                              | Session x Status             | 1,52 | 2.11    | 0.153   |     |
|                              | Treatment x Status           | 1,52 | 0.02    | 0.877   |     |
|                              | Session x Treatment x Status | 1,52 | 4.47    | 0.039   | *   |
| Stress-induced CORT          | Intercept                    | 1,51 | 471.3   | < 0.001 | *** |
|                              | Session                      | 1,51 | 4.66    | 0.036   | *   |
|                              | Treatment                    | 1,51 | 0.24    | 0.624   |     |
|                              | Status                       | 1,51 | 3.53    | 0.066   | .   |
|                              | Session x Treatment          | 1,51 | 7.79    | 0.007   | **  |
|                              | Session x Status             | 1,51 | 0.44    | 0.509   |     |
|                              | Treatment x Status           | 1,51 | 1.51    | 0.225   |     |
|                              | Session x Treatment x Status | 1,51 | 4.19    | 0.046   | *   |
| Adjusted Stress-induced CORT | Intercept                    | 1,51 | 567.1   | < 0.001 | *** |
|                              | Baseline CORT                | 1,50 | 19.50   | < 0.001 | *** |
|                              | Session                      | 1,50 | 1.26    | 0.268   |     |
|                              | Treatment                    | 1,51 | 0.48    | 0.492   |     |
|                              | Status                       | 1,51 | 0.43    | 0.515   |     |
|                              | Session x Treatment          | 1,50 | 4.66    | 0.036   | *   |
|                              | Session x Status             | 1,50 | 0.05    | 0.819   |     |
|                              | Treatment x Status           | 1,51 | 1.51    | 0.225   |     |
| Session x Treatment x Status | 1,50                         | 1.65 | 0.205   |         |     |

**Table 2.** Comparisons of CORT levels between (inter-group) and within (intra-group) pregnant and non-reproductive (NR) females from the control or the water-deprived (WD) treatment during initial and final sampling sessions. Table shows the results of *post hoc* Tukey's test. In adjusted stress-induced CORT level analysis, baseline CORT is included as a linear covariate.

|                                    | Inter-groups comparisons       |                             |                                |                            | Intra-group comparisons          |                                                                 |                                  |                             |
|------------------------------------|--------------------------------|-----------------------------|--------------------------------|----------------------------|----------------------------------|-----------------------------------------------------------------|----------------------------------|-----------------------------|
|                                    | Initial                        |                             | Final                          |                            | Pregnant                         |                                                                 | NR                               |                             |
|                                    | Pregnant:<br>Control vs.<br>WD | NR:<br>Control vs.<br>WD    | Pregnant:<br>Control vs.<br>WD | NR:<br>Control vs.<br>WD   | Control:<br>Initial vs.<br>Final | WD:<br>Initial vs.<br>Final                                     | Control:<br>Initial vs.<br>Final | WD:<br>Initial vs.<br>Final |
| Baseline CORT                      | $z = 0.91,$<br>$p = 0.985$     | $z = -0.30,$<br>$p > 0.999$ | $z = -1.45,$<br>$p = 0.833$    | $z = 0.16,$<br>$p > 0.999$ | $z = -0.39,$<br>$p > 0.999$      | <b><math>z = -3.78,</math></b><br><b><math>p = 0.004</math></b> | $z = -0.97,$<br>$p = 0.979$      | $z = -0.28,$<br>$p > 0.999$ |
| Stress-induced<br>CORT             | $z = 0.88,$<br>$p = 0.988$     | $z = 1.31,$<br>$p = 0.894$  | $z = -1.89,$<br>$p = 0.556$    | $z = 0.86,$<br>$p = 0.990$ | $z = 0.97,$<br>$p = 0.978$       | <b><math>z = -3.82,</math></b><br><b><math>p = 0.003</math></b> | $z = -0.38,$<br>$p > 0.999$      | $z = -1.18,$<br>$p = 0.936$ |
| Adjusted<br>Stress-induced<br>CORT | $z = 0.74,$<br>$p = 0.996$     | $z = 1.49,$<br>$p = 0.814$  | $z = -1.50,$<br>$p = 0.806$    | $z = 0.87,$<br>$p = 0.988$ | $z = 0.93,$<br>$p = 0.983$       | $z = -2.42,$<br>$p = 0.232$                                     | $z = -0.10,$<br>$p > 0.999$      | $z = -1.06,$<br>$p = 0.965$ |

Bold-faced characters represent significant effects.
